# Supplementary material
Source: PubMed Central journal article supplement (PMC6281344)
Supplement: esw047_suppl_Supplemental_Table_1.pdf [file esw047_suppl_Supplemental_Table_1.pdf]

| Taxonomic group |                        | Mean number of autosomes |       |             | Evidence supports |         |
|-----------------|------------------------|--------------------------|-------|-------------|-------------------|---------|
| Order           | Genus                  | XO/ZO                    | XY/ZW | Multi XY/ZW | Fusion            | Fission |
| Coleoptera      | <i>Acalymma</i>        | 10.1                     | -     | 18.0        | -                 | -       |
| Coleoptera      | <i>Adelocera</i>       | 8.0                      | 10.0  | -           | -                 | -       |
| Coleoptera      | <i>Agriotes</i>        | 9.0                      | 9.0   | -           | -                 | X       |
| Coleoptera      | <i>Alphitobius</i>     | 9.0                      | 9.0   | -           | -                 | -       |
| Coleoptera      | <i>Amystax</i>         | -                        | 8.5   | 10.0        | -                 | X       |
| Coleoptera      | <i>Anthonomus</i>      | 9.0                      | 15.5  | 20.0        | -                 | X       |
| Coleoptera      | <i>Aphodius</i>        | 9.0                      | 9.0   | -           | -                 | -       |
| Coleoptera      | <i>Aserica</i>         | 9.0                      | 9.0   | -           | -                 | -       |
| Coleoptera      | <i>Asphaera</i>        | -                        | 9.2   | 9.9         | -                 | X       |
| Coleoptera      | <i>Aulacophora</i>     | -                        | 17.5  | 27.6        | -                 | X       |
| Coleoptera      | <i>Bembidion</i>       | 11                       | 11.1  | -           | -                 | -       |
| Coleoptera      | <i>Botanochara</i>     | 15.0                     | -     | 18.8        | -                 | X       |
| Coleoptera      | <i>Calligrapha</i>     | 11.0                     | 11.0  | -           | -                 | -       |
| Coleoptera      | <i>Callosobruchus</i>  | 9.0                      | 9.0   | 9.0         | -                 | X       |
| Coleoptera      | <i>Calosoma</i>        | 13                       | 13    | -           | -                 | -       |
| Coleoptera      | <i>Cantharus</i>       | 6                        | 9     | -           | -                 | -       |
| Coleoptera      | <i>Carabus</i>         | 13                       | 13.5  | -           | -                 | -       |
| Coleoptera      | <i>Chilocorus</i>      | -                        | 9.6   | 11.0        | -                 | X       |
| Coleoptera      | <i>Chondrocephalus</i> | -                        | 14.0  | 17.0        | -                 | X       |
| Coleoptera      | <i>Chrysomela</i>      | -                        | 16.0  | 16.0        | -                 | X       |
| Coleoptera      | <i>Ctenicera</i>       | 9.0                      | 9.7   | -           | -                 | -       |
| Coleoptera      | <i>Deporaus</i>        | -                        | 11.3  | 13          | -                 | X       |
| Coleoptera      | <i>Dermestes</i>       | -                        | 8.0   | 8.0         | -                 | X       |
| Coleoptera      | <i>Diplocheila</i>     | 18.5                     | 20    | -           | -                 | -       |
| Coleoptera      | <i>Disonycha</i>       | 14.0                     | 22.5  | 20.0        | -                 | X       |
| Coleoptera      | <i>Drypta</i>          | 15.5                     | 16    | -           | -                 | -       |
| Coleoptera      | <i>Euparius</i>        | -                        | 10    | 23          | -                 | X       |
| Coleoptera      | <i>Heilipus</i>        | -                        | 12.7  | 13.0        | -                 | X       |
| Coleoptera      | <i>Hermaeophaga</i>    | -                        | 7.0   | 7.0         | -                 | X       |
| Coleoptera      | <i>Homoschema</i>      | -                        | 3.0   | 4.0         | -                 | X       |
| Coleoptera      | <i>Labidomera</i>      | 15.5                     | 16.0  | -           | -                 | -       |
| Coleoptera      | <i>Laccolptra</i>      | -                        | 8.0   | 8.0         | -                 | X       |
| Coleoptera      | <i>Lepidospyris</i>    | -                        | 10.0  | 10.0        | -                 | X       |
| Coleoptera      | <i>Leptinotarsa</i>    | 16.5                     | 17.0  | -           | -                 | -       |
| Coleoptera      | <i>Limonius</i>        | 8.0                      | 9.0   | -           | -                 | -       |
| Coleoptera      | <i>Melanius</i>        | 18.5                     | 20    | -           | -                 | -       |
| Coleoptera      | <i>Opatroides</i>      | -                        | 9.0   | 9.0         | -                 | X       |
| Coleoptera      | <i>Otiorhynchus</i>    | -                        | 10.0  | 10.0        | -                 | X       |
| Coleoptera      | <i>Oxythyrea</i>       | 9.0                      | 9.0   | -           | -                 | -       |
| Coleoptera      | <i>Pentodon</i>        | 9.0                      | 9.0   | -           | -                 | -       |
| Coleoptera      | <i>Pheropsophus</i>    | 14.2                     | 17    | -           | -                 | -       |
| Coleoptera      | <i>Philonthus</i>      | 15.0                     | 19.0  | -           | -                 | -       |
| Coleoptera      | <i>Pyrophorus</i>      | 6.5                      | -     | 7.0         | -                 | -       |
| Coleoptera      | <i>Rhynchaenus</i>     | 12.0                     | 12.4  | -           | -                 | -       |

| Taxonomic group |                         | Mean number of autosomes |       |             | Evidence supports |         |
|-----------------|-------------------------|--------------------------|-------|-------------|-------------------|---------|
| Order           | Genus                   | XO/ZO                    | XY/ZW | Multi XY/ZW | Fusion            | Fission |
| Coleoptera      | <i>Scepticus</i>        | -                        | 10    | 10          | -                 | X       |
| Coleoptera      | <i>Sitophilus</i>       | 5.0                      | 10.2  | -           | -                 | -       |
| Coleoptera      | <i>Stolas</i>           | -                        | 11.5  | 13          | -                 | X       |
| Coleoptera      | <i>Syphraea</i>         | 9.0                      | 11    | -           | -                 | -       |
| Coleoptera      | <i>Tanymecus</i>        | -                        | 10    | 10          | -                 | X       |
| Coleoptera      | <i>Trirhabda</i>        | 14.0                     | 14.3  | -           | -                 | -       |
| Coleoptera      | <i>Typophorus</i>       | -                        | 9     | 9           | -                 | X       |
| Diptera         | <i>Dasyllis</i>         | 4                        | 4     | -           | -                 | -       |
| Diptera         | <i>Hylemya</i>          | -                        | 10    | 10          | -                 | X       |
| Diptera         | <i>Pherbellia</i>       | 5                        | 5     | -           | -                 | -       |
| Diptera         | <i>Pteromicra</i>       | 4                        | 4     | -           | -                 | -       |
| Diptera         | <i>Tephritus</i>        | 5                        | 5     | -           | -                 | -       |
| Diptera         | <i>Toxomerus</i>        | -                        | 4     | 4           | -                 | X       |
| Odonata         | <i>Brachydiplax</i>     | 12                       | 12    | -           | -                 | -       |
| Coleoptera      | <i>Agabus</i>           | 21                       | 19.8  | -           | X                 | -       |
| Coleoptera      | <i>Agonum</i>           | 18.6                     | 16.4  | -           | X                 | -       |
| Coleoptera      | <i>Altica</i>           | -                        | 10.9  | 10.5        | X                 | -       |
| Coleoptera      | <i>Amara</i>            | 17.5                     | 14.4  | -           | X                 | -       |
| Coleoptera      | <i>Aphidecta</i>        | 9                        | 8.6   | -           | X                 | -       |
| Coleoptera      | <i>Apogonia</i>         | 9.3                      | 9     | -           | X                 | -       |
| Coleoptera      | <i>Bradybaenus</i>      | 18                       | 17    | -           | X                 | -       |
| Coleoptera      | <i>Bruchus</i>          | 18                       | 9.7   | -           | X                 | -       |
| Coleoptera      | <i>Calathus</i>         | 18.1                     | 17.3  | 10          | X                 | -       |
| Coleoptera      | <i>Cardiophorus</i>     | 10                       | 9.8   | -           | X                 | -       |
| Coleoptera      | <i>Cassida</i>          | -                        | 9.1   | 9           | X                 | -       |
| Coleoptera      | <i>Chlaenius</i>        | 18                       | 14    | -           | X                 | -       |
| Coleoptera      | <i>Chrysochus</i>       | 14                       | 11.5  | -           | X                 | -       |
| Coleoptera      | <i>Chrysolina</i>       | 16.4                     | 14.5  | -           | X                 | -       |
| Coleoptera      | <i>Colymbetes</i>       | 20                       | 19.3  | -           | X                 | -       |
| Coleoptera      | <i>Conoderus</i>        | 8                        | 6.5   | -           | X                 | -       |
| Coleoptera      | <i>Copris</i>           | 10                       | 7.1   | -           | X                 | -       |
| Coleoptera      | <i>Cymindis</i>         | 21                       | 15.6  | -           | X                 | -       |
| Coleoptera      | <i>Dermatoxenus</i>     | -                        | 9.7   | 8.5         | X                 | -       |
| Coleoptera      | <i>Diapromorpha</i>     | -                        | 10.3  | 10          | X                 | -       |
| Coleoptera      | <i>Elaphrus</i>         | 15.3                     | 15    | -           | X                 | -       |
| Coleoptera      | <i>Epicauta</i>         | -                        | 9.2   | 9           | X                 | -       |
| Coleoptera      | <i>Harpalus</i>         | 17.9                     | 16.3  | -           | X                 | -       |
| Coleoptera      | <i>Heikertingerella</i> | -                        | 9     | 8.3         | X                 | -       |
| Coleoptera      | <i>Heilipodus</i>       | -                        | 14    | 13          | X                 | -       |
| Coleoptera      | <i>Mecyclothorax</i>    | 11                       | 7     | -           | X                 | -       |
| Coleoptera      | <i>Megacephala</i>      | 15.6                     | 5     | -           | X                 | -       |
| Coleoptera      | <i>Melanotus</i>        | 9                        | 5     | -           | X                 | -       |
| Coleoptera      | <i>Monochamus</i>       | -                        | 9.5   | 9           | X                 | -       |
| Coleoptera      | <i>Monomacra</i>        | 16                       | 14    | -           | X                 | -       |

| Taxonomic group |                           | Mean number of autosomes |       |             | Evidence supports |         |
|-----------------|---------------------------|--------------------------|-------|-------------|-------------------|---------|
| Order           | Genus                     | XO/ZO                    | XY/ZW | Multi XY/ZW | Fusion            | Fission |
| Coleoptera      | <i>Notonomus</i>          | 17.1                     | 14    | -           | X                 | -       |
| Coleoptera      | <i>Omophoita</i>          | -                        | 10.1  | 10          | X                 | -       |
| Coleoptera      | <i>Pityogenes</i>         | -                        | 8.1   | 8           | X                 | -       |
| Coleoptera      | <i>Platynus</i>           | 17.7                     | 16.5  | -           | X                 | -       |
| Coleoptera      | <i>Poecilus</i>           | 18.2                     | 13    | -           | X                 | -       |
| Coleoptera      | <i>Pseudotetracha</i>     | -                        | 11.3  | 10          | X                 | -       |
| Coleoptera      | <i>Pterostichus</i>       | 18                       | 15    | -           | X                 | -       |
| Coleoptera      | <i>Rhyzobius</i>          | 8                        | 7.5   | -           | X                 | -       |
| Coleoptera      | <i>Scarites</i>           | 21.4                     | 25    | 18          | X                 | -       |
| Coleoptera      | <i>Siagona</i>            | 22                       | 21.7  | -           | X                 | -       |
| Coleoptera      | <i>Stictotarsus</i>       | 29.5                     | 27    | -           | X                 | -       |
| Coleoptera      | <i>Tripectus</i>          | 18                       | 11    | -           | X                 | -       |
| Dermaptera      | <i>Forficula</i>          | -                        | 11    | 10.3        | X                 | -       |
| Dermaptera      | <i>Nala</i>               | -                        | 17.5  | 16          | X                 | -       |
| Dermaptera      | <i>Nesogaster</i>         | 10                       | -     | 9           | X                 | -       |
| Diptera         | <i>Anastrepha</i>         | -                        | 4.8   | 3.5         | X                 | -       |
| Diptera         | <i>Bacha</i>              | -                        | 3.6   | 3           | X                 | -       |
| Diptera         | <i>Hemipyrellia</i>       | -                        | 5     | 4           | X                 | -       |
| Diptera         | <i>Sepedon</i>            | 5                        | 5     | 4           | X                 | -       |
| Isoptera        | <i>Cryptotermes</i>       | -                        | 23    | 16.4        | X                 | -       |
| Lepidoptera     | <i>Orygia</i>             | -                        | 11.5  | 10          | X                 | -       |
| Lepidoptera     | <i>Samia</i>              | 13                       | 12    | 11          | X                 | -       |
| Neuroptera      | <i>Plega</i>              | -                        | 10    | 8           | X                 | -       |
| Odonata         | <i>Aeshna</i>             | 12.7                     | 11.2  | -           | X                 | -       |
| Odonata         | <i>Crocothemis</i>        | 12                       | 11    | -           | X                 | -       |
| Odonata         | <i>Macrothemis</i>        | 11.7                     | 3     | -           | X                 | -       |
| Odonata         | <i>Mecistogaster</i>      | 14                       | 5     | -           | X                 | -       |
| Odonata         | <i>Orthemis</i>           | 11                       | 4     | -           | X                 | -       |
| Orthoptera      | <i>Dichroplus</i>         | 10.75                    | 9.6   | 9           | X                 | -       |
| Orthoptera      | <i>Diponthus</i>          | 10.5                     | 10    | -           | X                 | -       |
| Orthoptera      | <i>Leiotettix</i>         | 11                       | 8.5   | 5.5         | X                 | -       |
| Orthoptera      | <i>Scotussa</i>           | 10.5                     | 7     | 9           | X                 | X       |
| Orthoptera      | <i>Scyllina</i>           | 11                       | 10    | -           | X                 | -       |
| Orthoptera      | <i>Tetrixocephalus</i>    | 11                       | 10    | -           | X                 | -       |
| Orthoptera      | <i>Xyleus</i>             | 11                       | 10    | -           | X                 | -       |
| Orthoptera      | <i>Zoniopoda</i>          | 11                       | 10    | -           | X                 | -       |
| Phasmatodea     | <i>Didymuria</i>          | 17.6                     | 13.6  | -           | X                 | -       |
| Phasmatodea     | <i>Isagoras</i>           | 18                       | 16    | -           | X                 | -       |
| Phasmatodea     | <i>Prisopus</i>           | 24                       | 13    | -           | X                 | -       |
| Plecoptera      | <i>Perla</i> <sup>1</sup> | 9.5                      | 4     | 11.2        | X                 | X       |
| Hemiptera       | <i>Akbaratus</i>          | 6                        |       | 6           | -                 | X       |
| Hemiptera       | <i>Cimex</i>              |                          | 11.6  | 14          | -                 | X       |
| Hemiptera       | <i>Hesperocimex</i>       |                          | 19.5  | 19          | X                 | -       |
| Hemiptera       | <i>Stricticimex</i>       |                          | 11    | 18          | -                 | X       |

| Taxonomic group |                            | Mean number of autosomes |       |             | Evidence supports |         |
|-----------------|----------------------------|--------------------------|-------|-------------|-------------------|---------|
| Order           | Genus                      | XO/ZO                    | XY/ZW | Multi XY/ZW | Fusion            | Fission |
| Hemiptera       | <i>Acanthocephala</i>      | 10.5                     | 10    |             | X                 | -       |
| Hemiptera       | <i>Cletus</i> <sup>1</sup> | 8.5                      | 8     | 8           | X                 | X       |
| Hemiptera       | <i>Coreus</i>              | 10.5                     |       | 10          | X                 | -       |
| Hemiptera       | <i>Coriomeris</i>          | 6                        |       | 10          | -                 | X       |
| Hemiptera       | <i>Enoplops</i>            | 10                       |       | 10          | -                 | X       |
| Hemiptera       | <i>Hygia</i>               | 10                       |       | 10          | -                 | X       |
| Hemiptera       | <i>Ochrochira</i>          | 10                       |       | 12          | -                 | X       |
| Hemiptera       | <i>Gerris</i>              | 10.1                     | 11    |             | -                 | -       |
| Hemiptera       | <i>Hydrometra</i>          | 9                        | 9     |             | -                 | -       |
| Hemiptera       | <i>Arocatus</i>            |                          | 6     | 6           | -                 | X       |
| Hemiptera       | <i>Cavelerius</i>          |                          | 6     | 6           | -                 | X       |
| Hemiptera       | <i>Megalonotus</i>         |                          | 6     | 6           | -                 | X       |
| Hemiptera       | <i>Rhyparochromus</i>      |                          | 6     | 6           | -                 | X       |
| Hemiptera       | <i>Adelophocoris</i>       |                          | 11.6  | 13          | -                 | X       |
| Hemiptera       | <i>Dicyphus</i>            |                          | 23    | 23          | -                 | X       |
| Hemiptera       | <i>Plagiognathus</i>       | 15                       | 15    |             | -                 | -       |
| Hemiptera       | <i>Laccotrephes</i>        |                          | 20    | 19          | X                 | -       |
| Hemiptera       | <i>Nepa</i>                | 17                       |       | 14          | X                 | -       |
| Hemiptera       | <i>Ranatra</i>             |                          | 20.5  | 19          | X                 | -       |
| Hemiptera       | <i>Rhytidolomia</i>        |                          | 6     | 2           | X                 | -       |
| Hemiptera       | <i>Thyanta</i>             |                          | 6.3   | 12          | -                 | X       |
| Hemiptera       | <i>Bactericera</i>         | 12                       | 12    |             | -                 | -       |
| Hemiptera       | <i>Cacopsylla</i>          | 12                       | 11.5  |             | X                 | -       |
| Hemiptera       | <i>Psylla</i>              | 12                       | 10    |             | X                 | -       |
| Hemiptera       | <i>Ectomocoris</i>         |                          | 10    | 10          | -                 | X       |
| Hemiptera       | <i>Pygolampis</i>          |                          | 11    | 11          | -                 | X       |
| Hemiptera       | <i>Triatoma</i>            |                          | 10    | 10          | -                 | X       |
| Hemiptera       | <i>Saldula</i>             | 18                       | 17    |             | X                 | -       |
| Hemiptera       | <i>Dicranocephalus</i>     |                          | 6     | 6           | -                 | X       |
| Hemiptera       | <i>Microvelia</i>          | 10                       | 10    |             | -                 | -       |

<sup>1</sup> Data for origin of new Y chromosome is consistent with fusion while data for origin of complex sex chromosome is consistent with fission.
